# Supplementary material
Source: PubMed Central journal article supplement (PMC3641670)

**A**

|                          |                               |
|--------------------------|-------------------------------|
| <i>Hp nanos2</i> 5'UTR F | GGTACCCCGAAGACGCACTTCGTATTTCA |
| <i>Hp nanos2</i> 5'UTR R | GAATTCCTACTCTGCAATTGGACAAAAG  |
| <i>Hp nanos2</i> 3'UTR F | TCTAGAGCTGAGCAGCCTTTTCAG      |
| <i>Hp nanos2</i> 3'UTR R | GTCGACTTTAAAAGAATGTAGTACTTTC  |

**B**

|                                     |                                   |
|-------------------------------------|-----------------------------------|
| <i>Hp nanos2</i> 3'UTR $\Delta$ F   | GAGAGACCACATGGTCCTGCTG            |
| <i>Hp nanos2</i> 3'UTR $\Delta$ 1 R | ACGCGTCGACTGGTTTAACACCAACACAAAGC  |
| <i>Hp nanos2</i> 3'UTR $\Delta$ 2 R | ACGCGTCGACGGCTAGTTGTTAAGGCAGTAATC |
| <i>Hp nanos2</i> 3'UTR $\Delta$ 3 R | ACGCGTCGACAATTAGCACGATATATTGAC    |
| <i>Hp nanos2</i> 3'UTR $\Delta$ 4 R | ACGCGTCGACGAACTACCATCACGAAGCAGTG  |
| <i>Hp nanos2</i> 3'UTR $\Delta$ 5 R | ACGCGTCGACTTATATTACCAAAGCCTGCACAC |
| <i>Hp nanos2</i> 3'UTR $\Delta$ 6 R | ACGCGTCGACGAGTCAAGTCC CATCAATCTC  |

**C**

|                                      |                                |
|--------------------------------------|--------------------------------|
| <i>Hp nanos2</i> 3'UTR $\Delta$ 7 F  | CGTCTAGAGAGATTGATGGGACTTGACTC  |
| <i>Hp nanos2</i> 3'UTR $\Delta$ 8 F  | CGTCTAGAGTGTGCAGGCTTTGG        |
| <i>Hp nanos2</i> 3'UTR $\Delta$ 9 F  | CGTCTAGACACTGCTTCGTGATGGTAGTTC |
| <i>Hp nanos2</i> 3'UTR $\Delta$ 10 F | CGTCTAGAAATTTGTCAATATATCGTGC   |
| <i>Hp nanos2</i> 3'UTR $\Delta$ R    | TTTAAAAGAATGTAGTACTTTTCG       |

**D**

|                                    |                         |
|------------------------------------|-------------------------|
| <i>Hp nanos</i> 5'UTR $\Delta$ A F | CACTGCTTCGTGATGGTAGTTC  |
| <i>Hp nanos</i> 5'UTR $\Delta$ A R | TGAGTCAAGTCCCATCAATCTC  |
| <i>Hp nanos</i> 5'UTR $\Delta$ B F | CACTGCTTCGTGATGGTAGTTC  |
| <i>Hp nanos</i> 5'UTR $\Delta$ B R | TTATATTACCAAAGCCTGCACAC |
| <i>Hp nanos</i> 5'UTR $\Delta$ C F | GTGTGCAGGCTTTGG         |
| <i>Hp nanos</i> 5'UTR $\Delta$ C R | TGAGTCAAGTCCCATCAATCT C |

# Figure S2

**A**

|                          |                                          |
|--------------------------|------------------------------------------|
| <i>Sp nanos2</i> 5'UTR F | GGTTCGGGCCCCACGTGCCTCATTAAAGCCCACATAAAT  |
| <i>Sp nanos2</i> 5'UTR R | CCGGGATCCGGTGA CTAAAGTGCGTGGAAACTCGAGAC  |
| <i>Sp nanos2</i> 3'UTR F | GACTAGTTCTGAGCAGCCTTTGCAGCACGACAC        |
| <i>Sp nanos2</i> 3'UTR R | GGAATTCCATATGTTTTAAAAGAATGTAGTACCTTCGTAC |

**B**

|                           |                                            |
|---------------------------|--------------------------------------------|
| <i>Sp nanos2</i> GNARLE F | GGAATTCCATATGGAATTTCCACAAGAAA ACTCCCATCGCG |
| <i>Sp nanos2</i> GNARLE R | CGACTAGTGA TGAGACTTGGACAACTCATTT           |

**C**

|                                     |                                       |
|-------------------------------------|---------------------------------------|
| <i>Sp nanos2</i> $\Delta$ GNARLE F1 | GAGACTTGGACAACTGAATTCTTAATTTCTTTTTTC  |
| <i>Sp nanos2</i> $\Delta$ GNARLE R1 | GAAAAAGAAATTAAGAATTCAGTTGTCCAAGTCTC   |
| <i>Sp nanos2</i> $\Delta$ GNARLE F2 | CATTAATGCAGGGAATTC ACTGCTTCGCGATGGGAG |
| <i>Sp nanos2</i> $\Delta$ GNARLE R2 | CTCCCATCGCGAAGCAGTGAATTCCCTGCATTAATG  |

**D**

|                         |                                       |
|-------------------------|---------------------------------------|
| <i>Sp nanos2</i> NRRE F | CGACTAGTAGTTAATTTGATGTAGGGTCTACTC     |
| <i>Sp nanos2</i> NRRE R | GGAATTCCATATGATAATAACCTACTTTAAAAAATAC |

**E**

|                                        |                                            |
|----------------------------------------|--------------------------------------------|
| <i>Sp nanos2</i> 5'UTR ren F           | AATACAAGCTTCACGTGCCTCATTAAAGCCCACATAAAT    |
| <i>Sp nanos2</i> 5'UTR ren R           | GGTTCGGGCCCCGGTGA CTAAAGTGCGTGGAAACTCGAGAC |
| <i>Sp nanos2</i> 3'UTR ren F           | GACTAGTTCTGAGCAGCCTTTGCAGCACGACAC          |
| <i>Sp nanos2</i> 3'UTR ren R           | CGCGGATCCTTTTAAAAGAATGTAGTACCTTCGTAC       |
| <i>Sp nanos2</i> GNARLE ren F          | CGACTAGTGATGAGACTTGGACAACTCATTT            |
| <i>Sp nanos2</i> GNARLE ren R          | CGCGGATCCGAATTTCCACAAGA AA ACTCCCATCGCG    |
| <i>Sp nanos2</i> $\Delta$ GNARLE ren F | CGACTAGTTCTGAGCAGCCTTTGCA GCACGAC          |
| <i>Sp nanos2</i> $\Delta$ GNARLE ren R | CGCGGATCCTTTTAAAAGAATGTAGTACCTTC           |

Figure  
S3

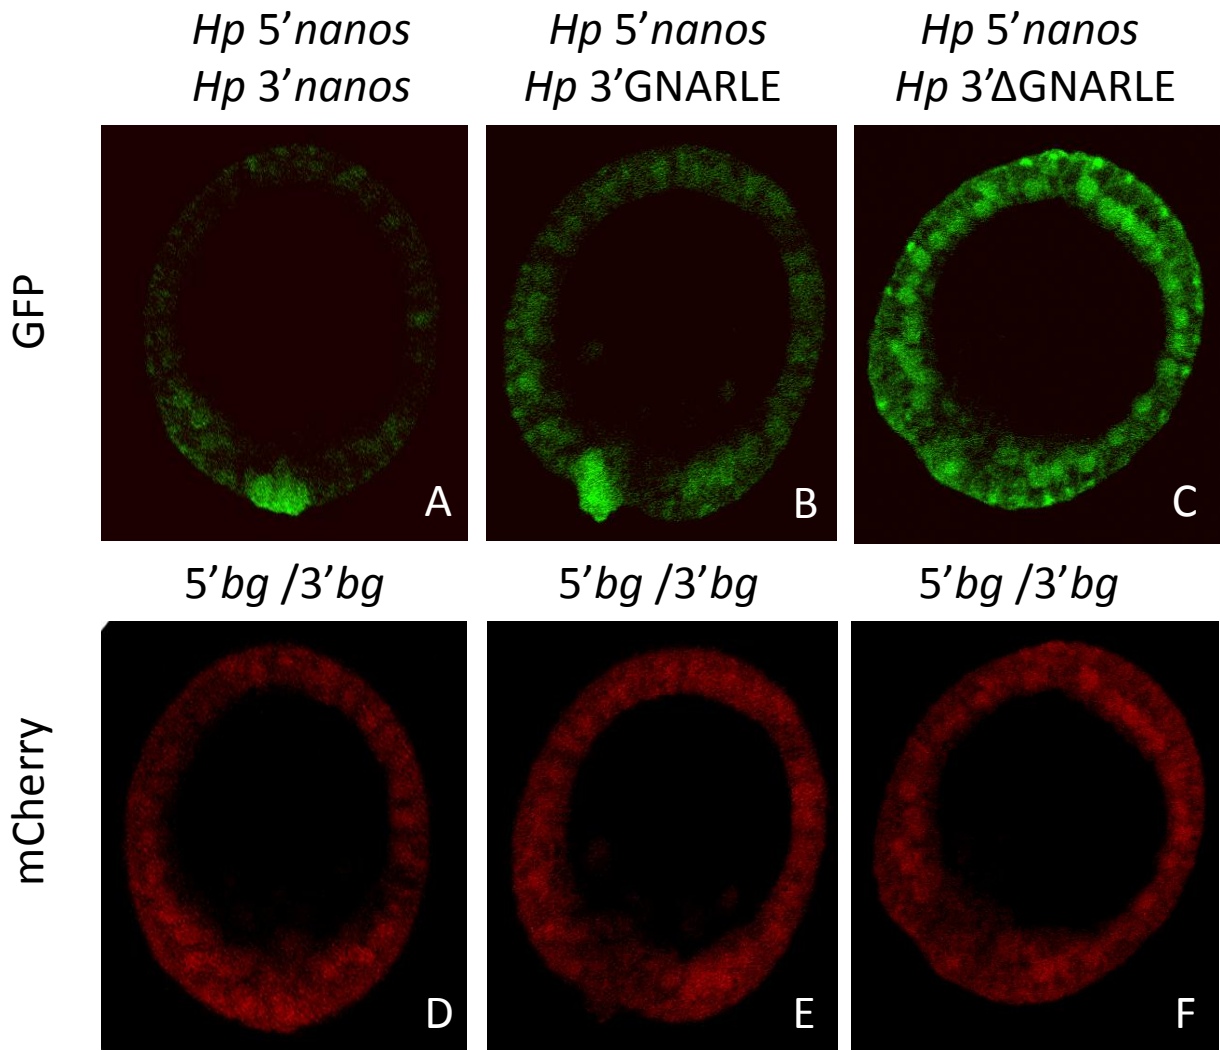

**Figure  
S4**

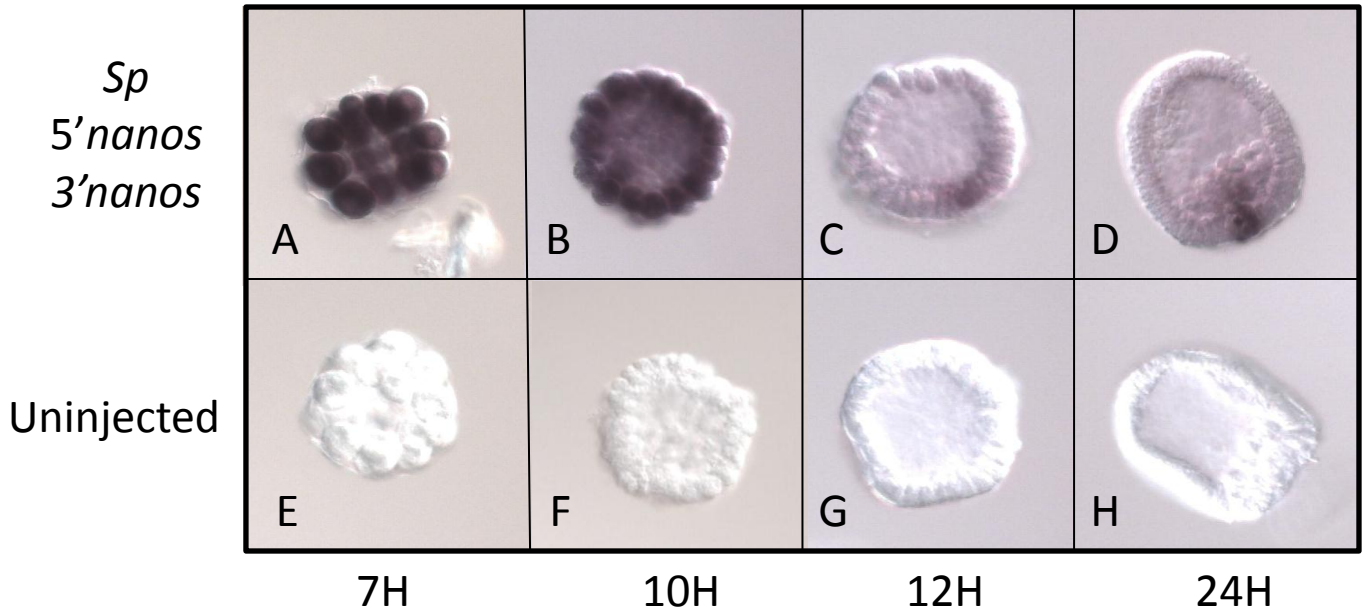

## A

```

Sp  AGTTAATTTGATGTAG--GGTCTACTCGICTCGAGGTTGATGAGACTTGGACAAC TC 55
Hp  ATTGGACTTTTGCAGTTGATGAACTCGICTCGAGATTGATGGGACTTG----ACTC 53
* **..: * :** ** *,* :*****.*****.***** ****

```

## B

```

Sp  ACTGCTTCGCGATGGGAGTTTCTTGTGGAAATTCATTGCGAGAAGTATTTTTTAAAGTA 60
Hp  ACTGCTTCGTGATGGTAG--TTCTCGCGGAATTCATTGCGAGAAGTATTTTTTAAAGTA 58
***** ***** ** **** * **,*****

Sp  GGTTATTAT 69
Hp  GGCTATTAT 67
** *****

```

**Figure  
S6**

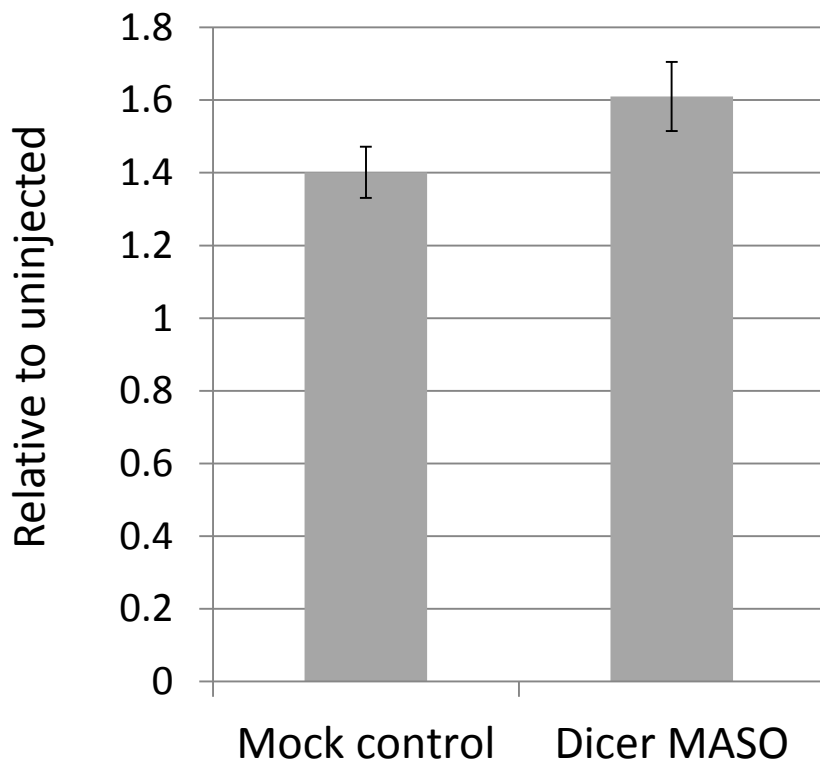

Supplement: NIHMS458539-supplement-01.pdf [file NIHMS458539-supplement-01.pdf]
